# Supplementary material for: The effects of ligand decomposition on the pseudo first-order profile of a ligand substitution reaction: a “silent killer” in the background
Source: Royal Society of Chemistry journal article supplement (doi:10.1039/c2nj40055c), 2012-01-01

## Supporting Information

### The Effects of Ligand Decomposition on the Pseudo-First Order Profile of a Ligand Substitution Reaction: A “silent killer” in the background

Andrew R. Conrad, Hanaa A. Hassanin, Michael J. Tubergen, István Fábián, and Nicola E. Brasch

#### Derivation of Equation (4)

For the system

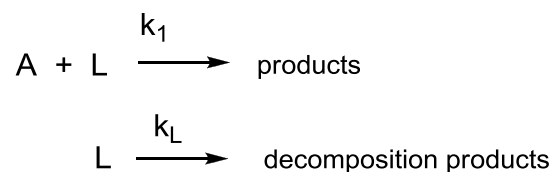

$$\frac{d[A]}{dt} = -k_1[A][L]$$

$$\frac{d[L]}{dt} = -k_1[A][L] - k_L[L]$$

$$\frac{d[L]}{d[A]} = \frac{-k_1[A][L] - k_L[L]}{-k_1[A][L]}$$

$$\frac{d[L]}{d[A]} = 1 + \frac{k_L}{k_1[A]}$$

$$d[L] = \left(1 + \frac{k_L}{k_1[A]}\right) d[A]$$

Integrating gives  $[L] = [A] + \frac{k_L}{k_1} \ln[A] + c_1$  where  $c_1$  is a constant.

Now,

$$\begin{aligned} \frac{d[A]}{dt} &= -k_1[A][L] \\ &= -k_1[A] \left( [A] + \frac{k_L}{k_1} \ln[A] + c_1 \right) \end{aligned}$$

Then,

$$\frac{d[A]}{dt} = -k_1[A]^2 - k_L[A] \ln[A] - k_1[A]c_1$$

$$\int \frac{d[A]}{k_1[A]^2 + k_L[A] \ln[A] + k_1[A]c_1} = -t + c_2 \text{ where } c_2 \text{ is a constant.}$$

This integral cannot be determined analytically (solved by quadrature).

**Figure S1.**

Best fit of the simulated data at  $k_1[L]_0/k_L = 1$  assuming that the reaction fits a simple first-order equation, giving  $k_{1st} = 8.363 \times 10^{-3} \text{ min}^{-1}$ . The simulated data has been fitted for the first 5 half lives of the reaction. The following parameters were fixed to obtain the simulated data:  $[L]_0 = 5.00 \times 10^{-4} \text{ M}$ ,  $[A]_0 = 5.00 \times 10^{-5} \text{ M}$ ,  $dt = 1 \times 10^{-3} \text{ min}$ ,  $k_1 = 12.4 \text{ M}^{-1} \text{ min}^{-1}$  and  $k_L = 6.20 \times 10^{-3} \text{ min}^{-1}$ . Selected data points are shown for clarity.

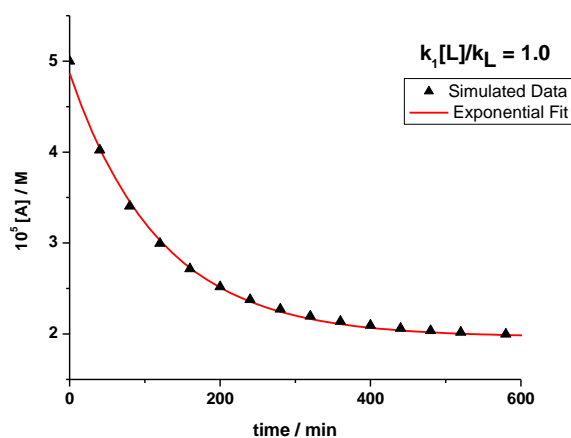

**Figure S2**

Best fit of the simulated data at  $k_1[L]_0/k_L = 0.5$  assuming that the reaction fits a simple first-order equation, giving  $k_{1st} = 1.446 \times 10^{-2} \text{ min}^{-1}$ . The simulated data has been fitted for the first five half lives of the reaction. The following parameters were fixed to obtain the simulated data:  $[L]_0 = 5.00 \times 10^{-4} \text{ M}$ ,  $[A]_0 = 5.00 \times 10^{-5} \text{ M}$ ,  $dt = 1 \times 10^{-3} \text{ min}$ ,  $k_1 = 12.4 \text{ M}^{-1} \text{ min}^{-1}$  and  $k_L = 0.0124 \text{ min}^{-1}$ . Selected data points are shown for clarity.

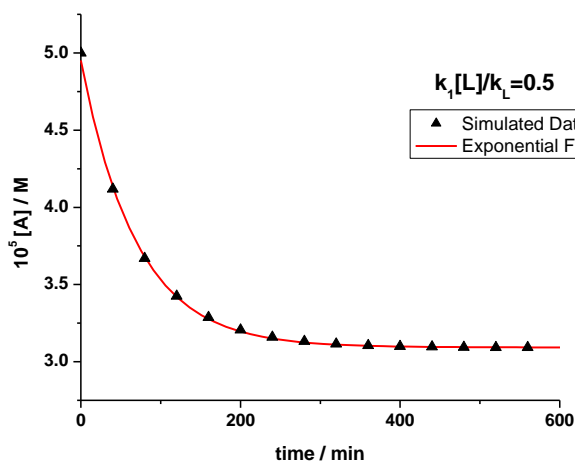

### Figure S3

Best fit of the simulated data at  $k_1[L]_0/k_L = 5.0$  assuming that the reaction fits a simple first-order equation, giving  $k_{1st} = 5.187 \times 10^{-3} \text{ min}^{-1}$ . The simulated data has been fitted for the first five half lives of the reaction. The following parameters were fixed to obtain the simulated data:  $[L]_0 = 5.00 \times 10^{-4} \text{ M}$ ,  $[A]_0 = 5.00 \times 10^{-5} \text{ M}$ ,  $dt = 1 \times 10^{-3} \text{ min}$ ,  $k_1 = 12.4 \text{ M}^{-1} \text{ min}^{-1}$  and  $k_L = 1.24 \times 10^{-3} \text{ min}^{-1}$ . Selected data points are shown for clarity.

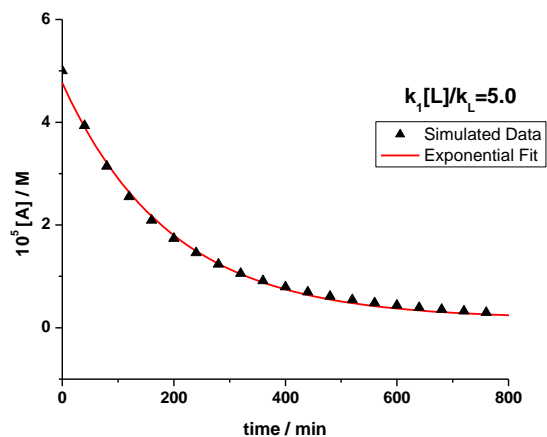

**Figure S4**

An expanded view of Figure 5c) in the main text.

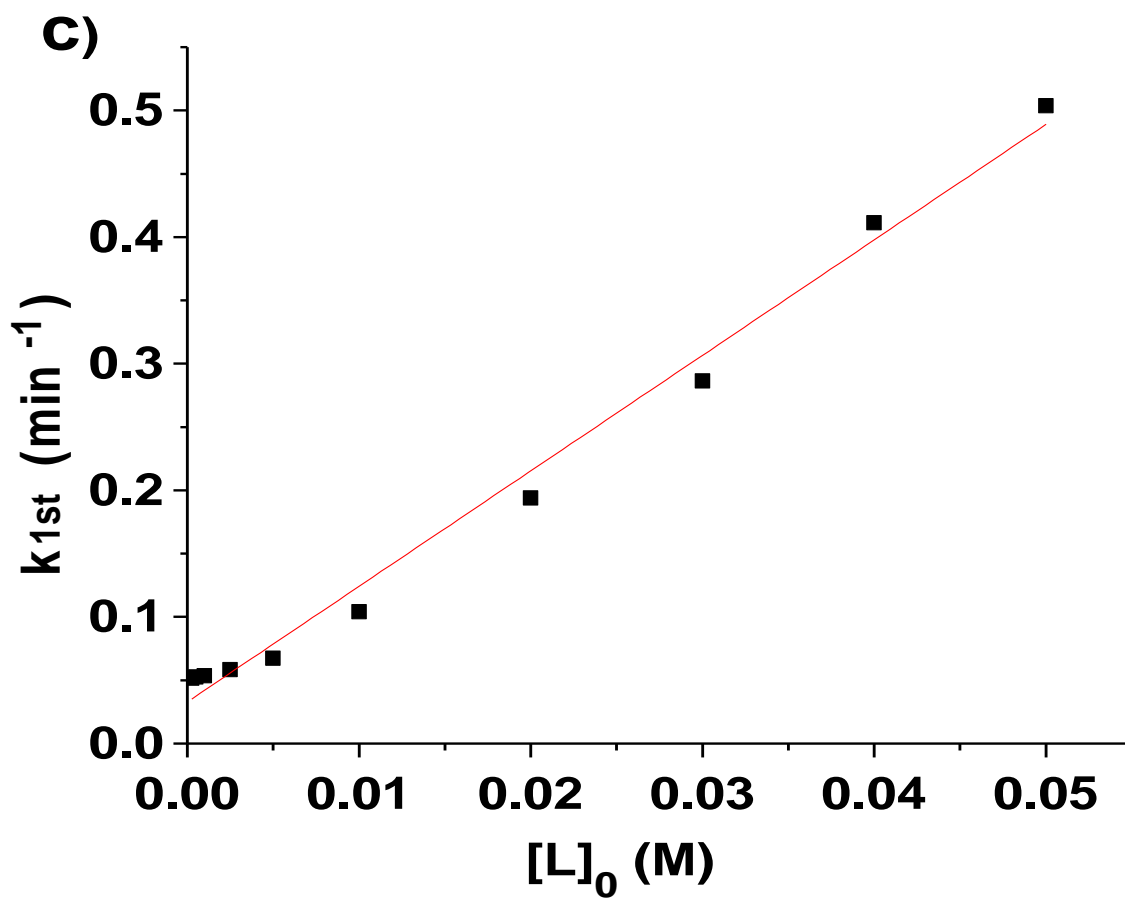

Supplement: c2nj40055c.pdf [file c2nj40055c.pdf]
